# Supplementary material for: Whole-Genome Resequencing Reveals the Genetic Diversity and Selection Signatures of the Brassica juncea from the Yunnan–Guizhou Plateau
Source: MDPI journal article supplement (doi:10.3390/agronomy13041053), 2023-04-04
Supplement: s1 [file s1]

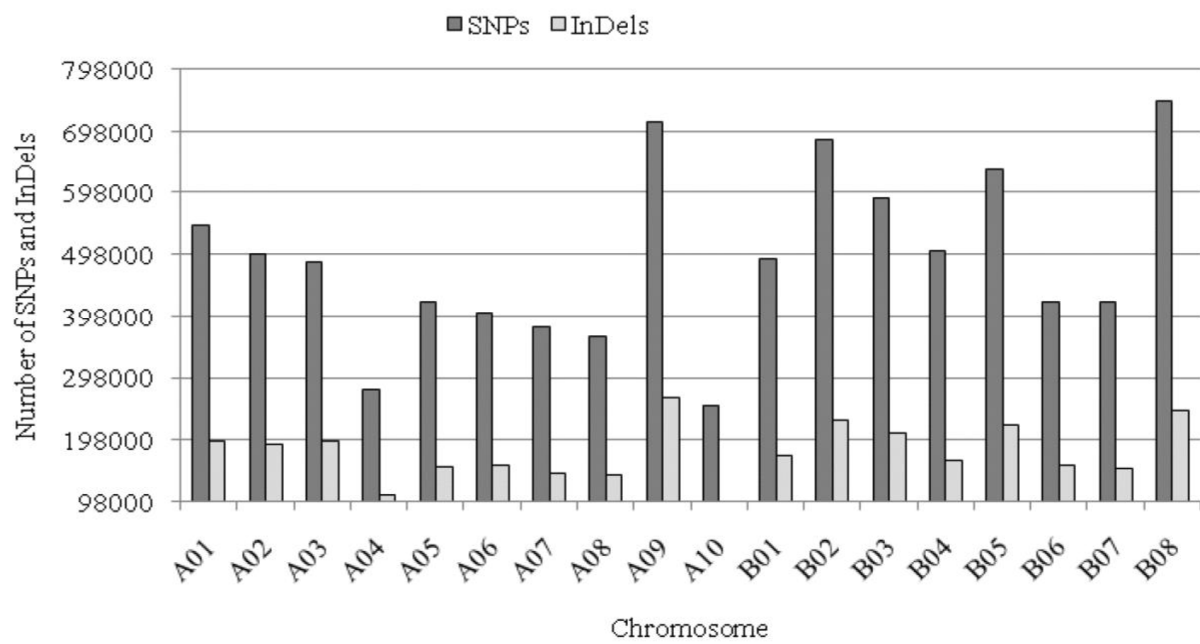

**Figure S1.** Single nucleotide polymorphisms (SNP) and InDels distribution in the 18 chromosomes of *B. juncea*.

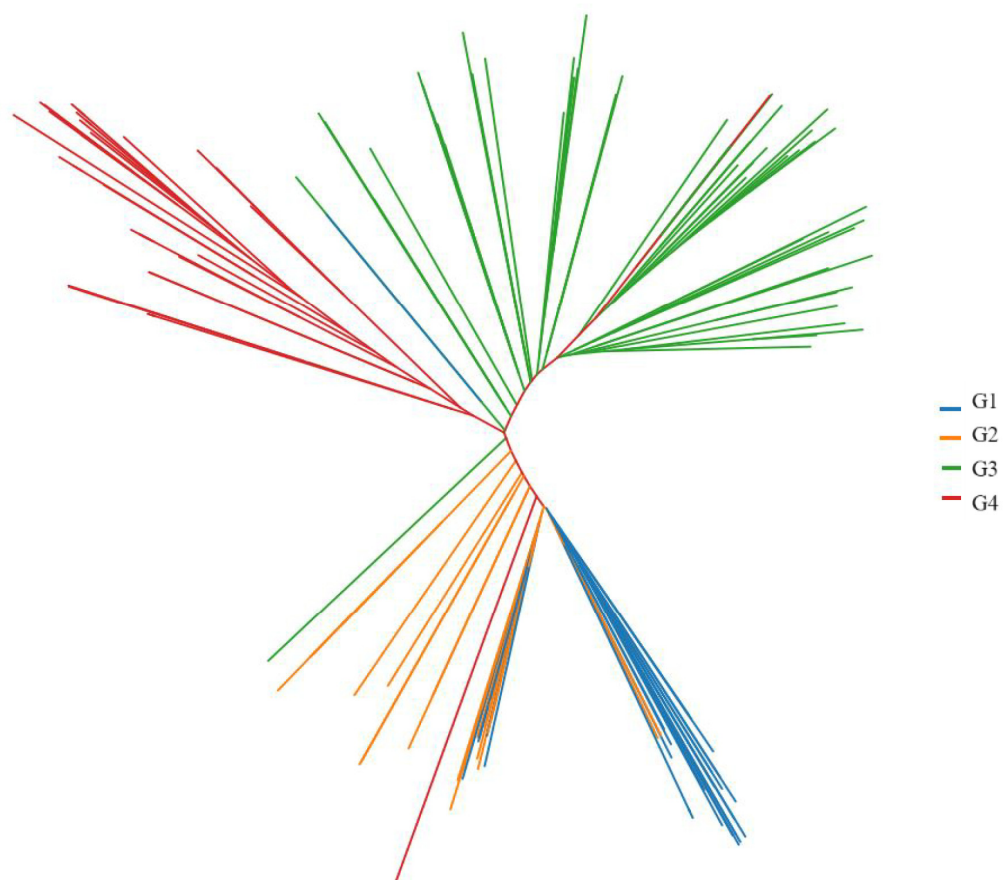

**Figure S2.** Phylogenetic tree of 193 *B. juncea* accessions.

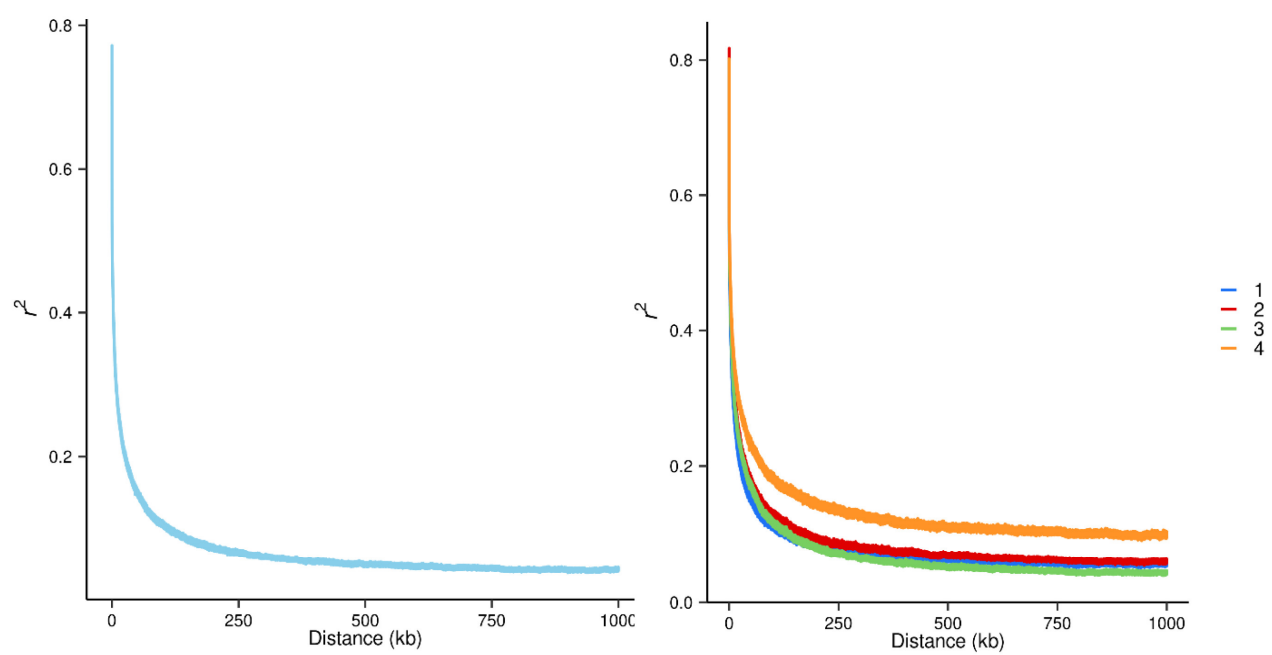

**Figure S3.** All accessions and group-specific LD decay plots.

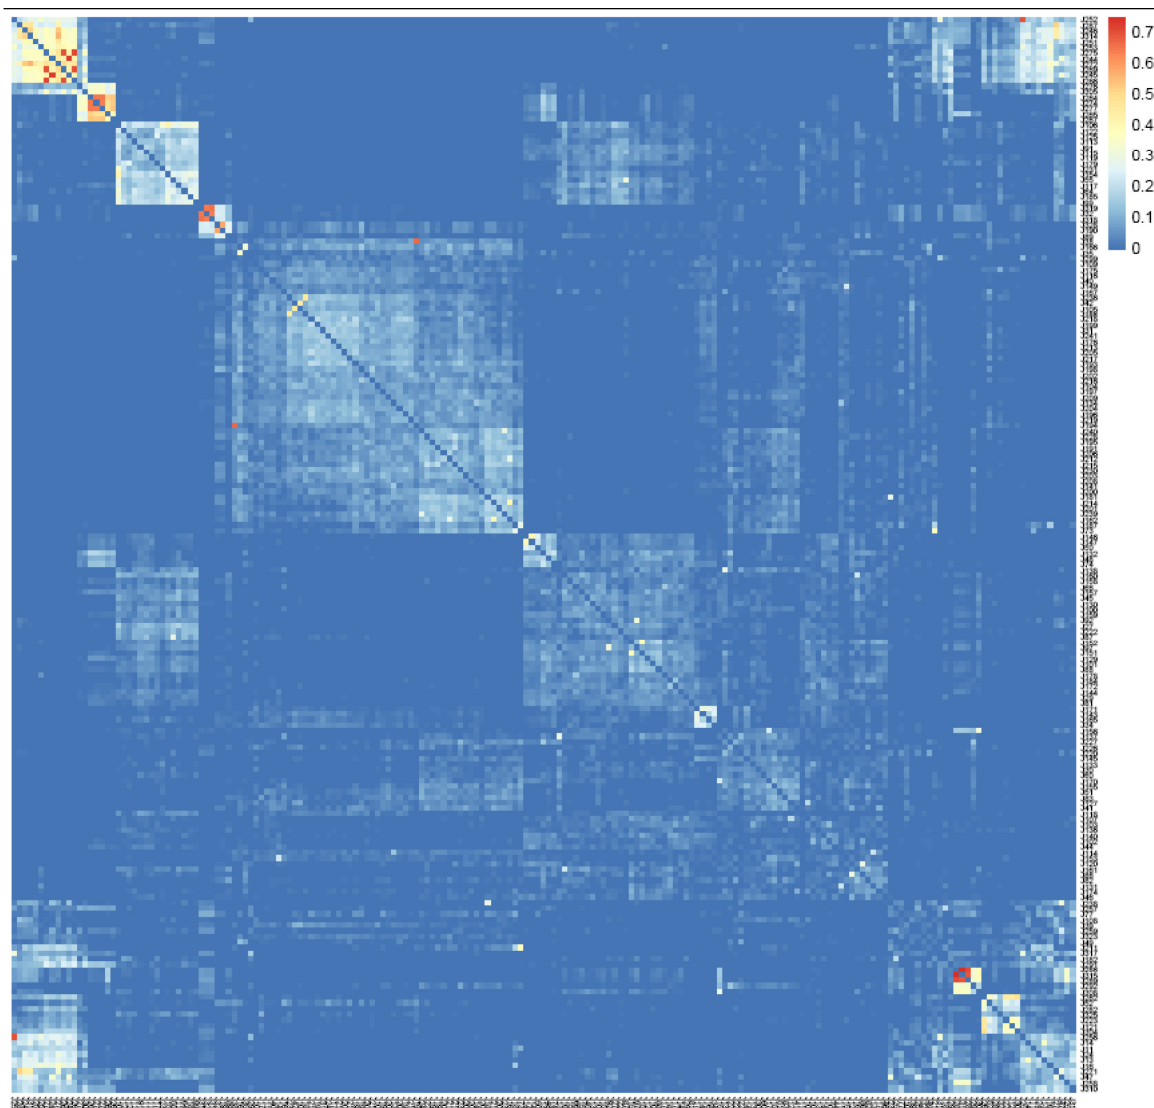

**Figure S4.** The heatmap of kinship of 193 *B. juncea* accessions.



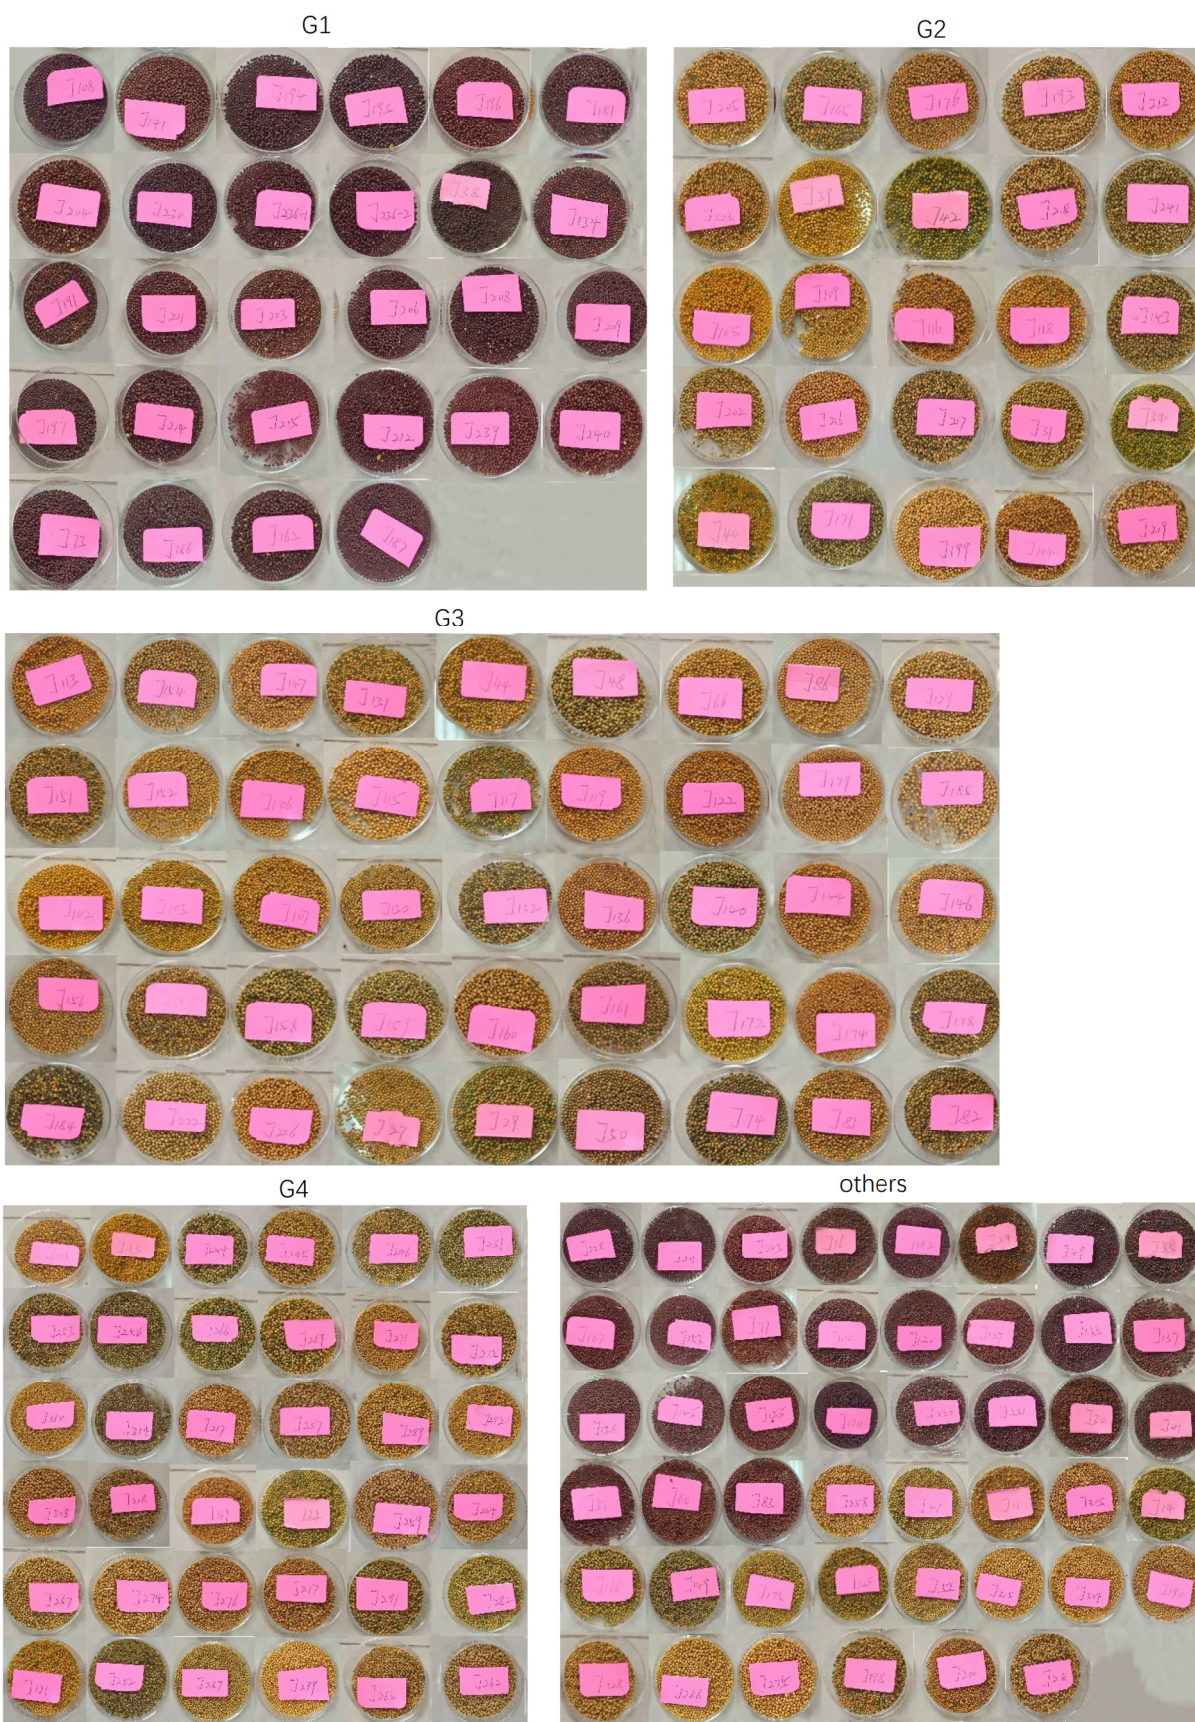

**Figure S5.** Seed coat color of 193 *B. juncea* accessions.

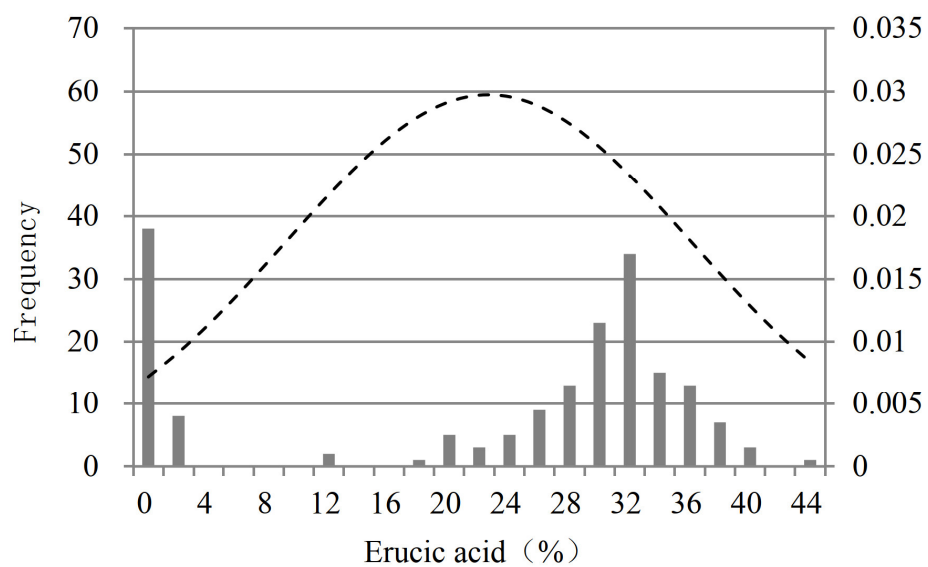

**Figure S6.** Frequency distribution diagram of erucic acid content in 193 *B. juncea* accessions.



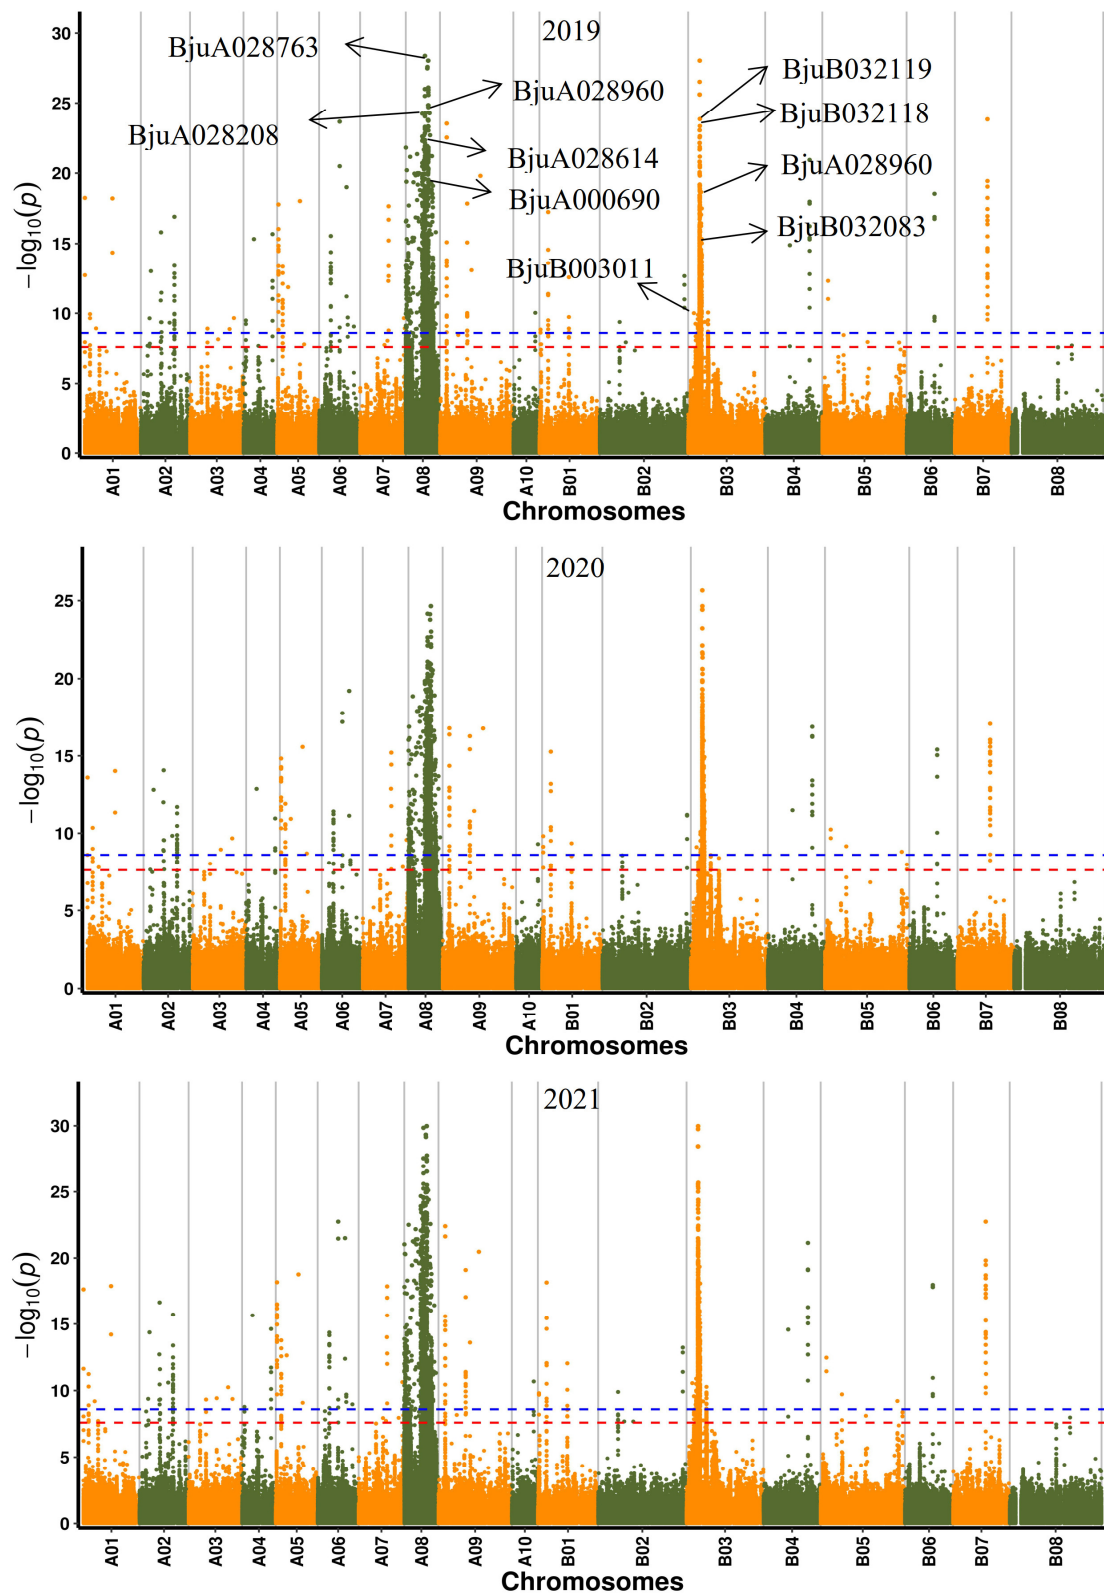

**Figure S7.** GWAS of erucic acid metabolism in *B. juncea* in three years. Candidate genes significantly associated with erucic acid metabolism are labeled in each year. The significance threshold of  $-\log_{10} p$  value was set at 8.
